# Supplementary material for: Postoperative changes of the microbiome: are surgical complications related to the gut flora? A systematic review
Source: Springer Nature journal article supplement (doi:10.1186/s12893-017-0325-8), 2017-12-01

Appendix

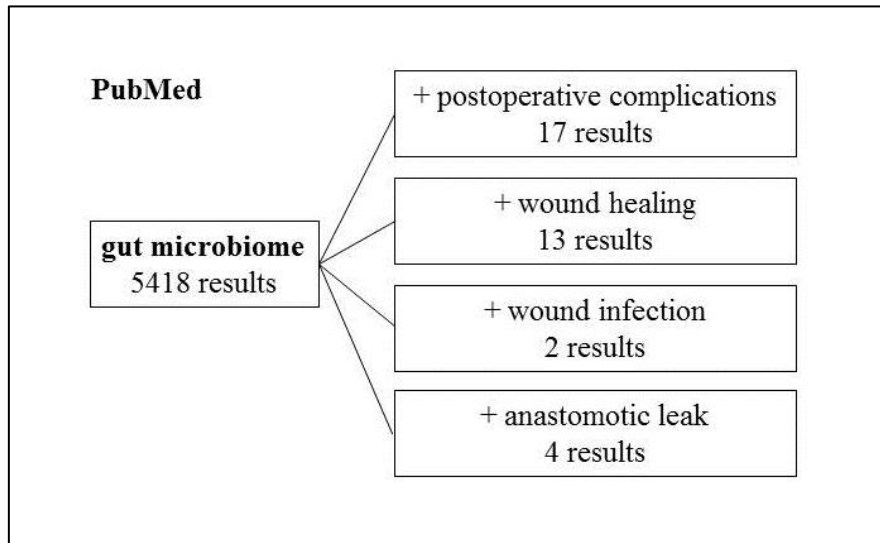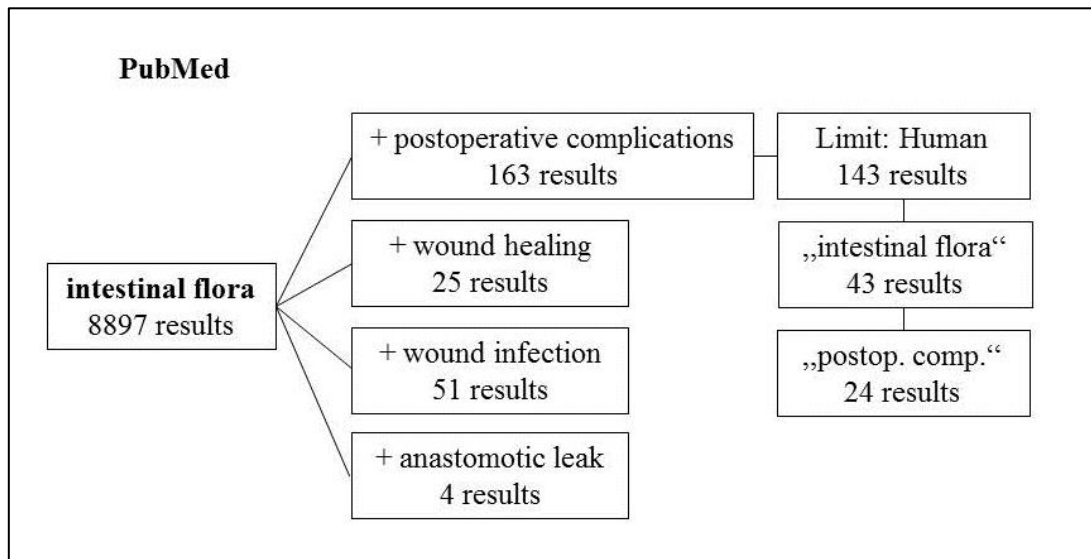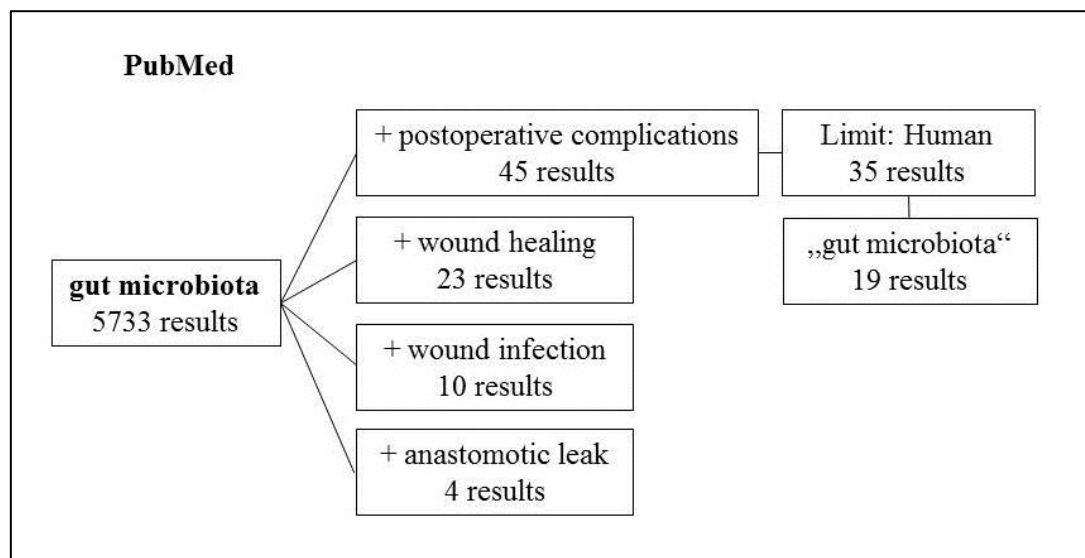

<https://www.ncbi.nlm.nih.gov/pubmed>

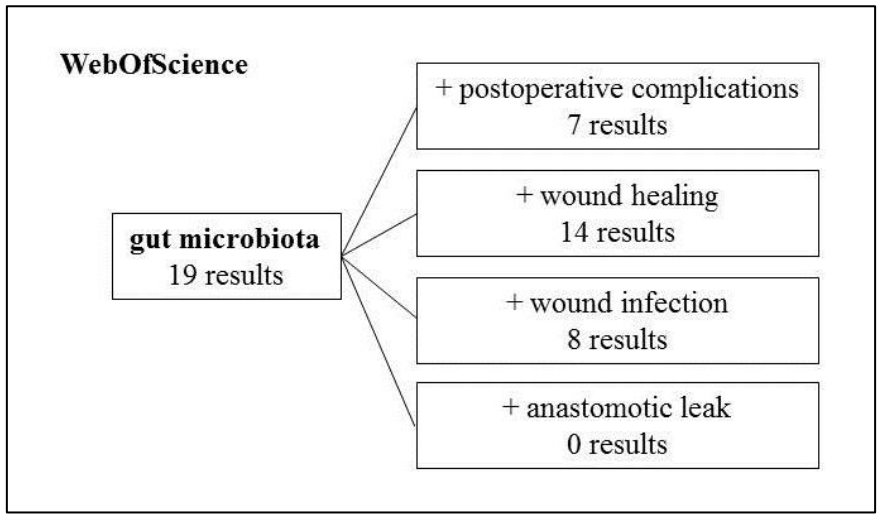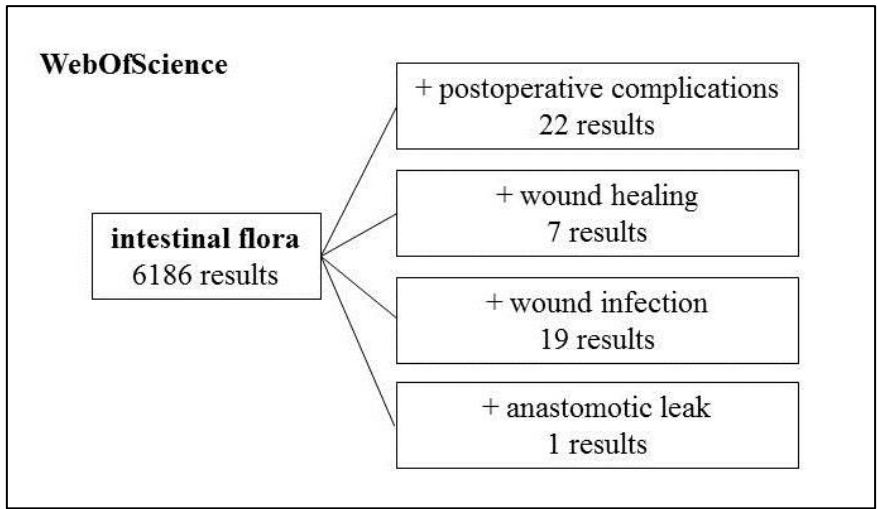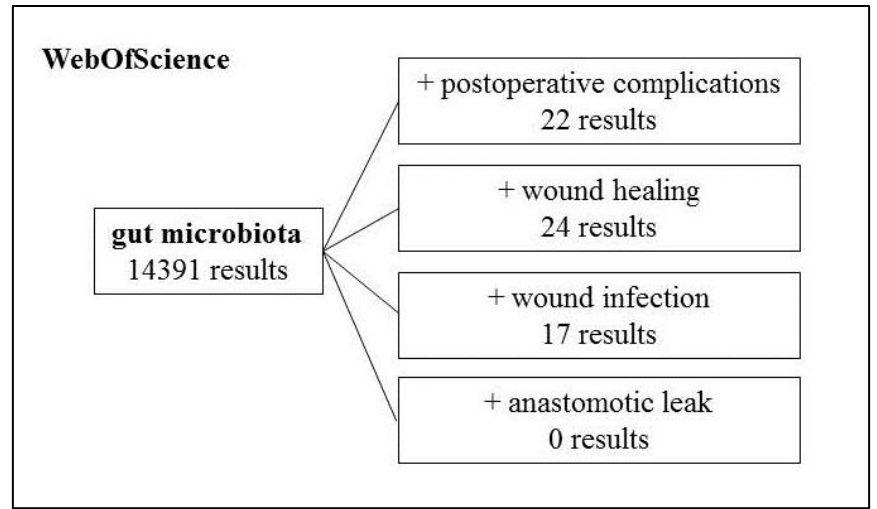

Supplement: MOESM1 [file 15277304]
